# Supplementary material for: Fine grained compositional analysis of Port Everglades Inlet microbiome using high throughput DNA sequencing
Source: PeerJ. 2018 May 8;6:e4671. doi: 10.7717/peerj.4671 (PMC5947159; doi:10.7717/peerj.4671)
Supplement: Supplemental Information 1 — Ion chromatography results for samples taken in two different locations in PEI. In cells where n/a is present it means that ion concentrations were below the calibration level of the instrument. [file peerj-06-4671-s009.xlsx]

## Sheet: Sheet1
Summary Results (mass concentration)															Summary results (molar concentration)
Injection Name	Concentration (PPM) Diluted by 1,000							Actual Mass Concentration (mg/L)							Actual Molar Concentration (mol/L)
	FLUORIDE (PPM)	CHLORIDE (PPM)	NITRITE (PPM)	BROMIDE (PPM)	NITRATE (PPM)	PHOSPHATE (PPM)	SULFATE (PPM)	FLUORIDE (mg/L)	CHLORIDE (mg/L)	NITRITE (PPM)	BROMIDE (PPM)	NITRATE (mg/L)	PHOSPHATE (mg/L)	SULFATE (mg/L)	CHLORIDE ION (mol/L)	SULFATE ION (mol/L)	PHOSPHATE ION (mol/L)
7/10/13 Sample #1 BB	n.a.	27.367	n.a.	n.a.	n.a.	n.a.	3.179	n.a.	27367	n.a.	n.a.	n.a.	n.a.	3179	0.771989	0.0330905	n.a.
7/10/13 Sample #2 M9	n.a.	18.397	n.a.	n.a.	n.a.	n.a.	2.247	n.a.	18397	n.a.	n.a.	n.a.	n.a.	2247	0.518956	0.0233892	n.a.
7/10/13 Sample #3 M9	n.a.	19.389	n.a.	n.a.	n.a.	n.a.	2.353	n.a.	19389	n.a.	n.a.	n.a.	n.a.	2353	0.546939	0.0244926	n.a.
7/19/13 Sample #1 BB	n.a.	6.938	n.a.	n.a.	n.a.	n.a.	0.959	n.a.	6938	n.a.	n.a.	n.a.	n.a.	959	0.195712	0.0099823	n.a.
7/19/13 Sample #2 M9	n.a.	7.733	n.a.	n.a.	n.a.	n.a.	1.066	n.a.	7733	n.a.	n.a.	n.a.	n.a.	1066	0.218138	0.0110961	n.a.
7/19/13 Sample #3 M9	n.a.	6.265	n.a.	n.a.	n.a.	n.a.	0.906	n.a.	6265	n.a.	n.a.	n.a.	n.a.	906	0.176728	0.00943062	n.a.
7/23/13 Sample #1 BB	n.a.	11.948	n.a.	n.a.	n.a.	n.a.	1.558	n.a.	11948	n.a.	n.a.	n.a.	n.a.	1558	0.337038	0.0162173	n.a.
7/23/13 Sample #2 M9	n.a.	12.562	n.a.	n.a.	n.a.	n.a.	1.635	n.a.	12562	n.a.	n.a.	n.a.	n.a.	1635	0.354358	0.0170188	n.a.
7/23/13 Sample #3 M9	n.a.	8.934	n.a.	n.a.	n.a.	n.a.	1.198	n.a.	8934	n.a.	n.a.	n.a.	n.a.	1198	0.252017	0.0124701	n.a.
8/17/13Sample #1 BB)	n.a.	16.336	n.a.	n.a.	n.a.	n.a.	2.063	n.a.	16336	n.a.	n.a.	n.a.	n.a.	2063	0.460818	0.0214739	n.a.
8/17/13 Sample #2 M9	n.a.	14.332	n.a.	n.a.	n.a.	n.a.	1.887	n.a.	14332	n.a.	n.a.	n.a.	n.a.	1887	0.404288	0.0196419	n.a.
8/17/13 Sample #3 M9	n.a.	15.439	n.a.	n.a.	n.a.	n.a.	1.966	n.a.	15439	n.a.	n.a.	n.a.	n.a.	1966	0.435515	0.0204642	n.a.
8/20/13 Sample #1 BB	n.a.	19.084	n.a.	n.a.	n.a.	n.a.	2.339	n.a.	19084	n.a.	n.a.	n.a.	n.a.	2339	0.538336	0.0243468	n.a.
8/20/13 Sample #2 M9	n.a.	19.9	n.a.	n.a.	n.a.	n.a.	2.436	n.a.	19900	n.a.	n.a.	n.a.	n.a.	2436	0.561354	0.0253565	n.a.
9/5/13 Sample #1 BB)	n.a.	15.433	n.a.	n.a.	n.a.	n.a.	1.965	n.a.	15433	n.a.	n.a.	n.a.	n.a.	1965	0.435346	0.0204538	n.a.
9/5/13 Sample #2 M9	n.a.	15.504	n.a.	n.a.	n.a.	n.a.	1.925	n.a.	15504	n.a.	n.a.	n.a.	n.a.	1925	0.437348	0.0200375	n.a.
9/12/13 Sample #2 M9	n.a.	14.22	n.a.	n.a.	n.a.	n.a.	1.813	n.a.	14220	n.a.	n.a.	n.a.	n.a.	1813	0.401128	0.0188717	n.a.
10/3/13 Sample #1 BB	n.a.	8.552	n.a.	n.a.	n.a.	n.a.	1.173	n.a.	8552	n.a.	n.a.	n.a.	n.a.	1173	0.241241	0.0122098	n.a.
10/3/13 Sample #2 M9	n.a.	15.703	n.a.	n.a.	n.a.	n.a.	1.976	n.a.	15703	n.a.	n.a.	n.a.	n.a.	1976	0.442962	0.0205683	n.a.
10/11/12 Sample #1 BB	n.a.	15.699	n.a.	n.a.	n.a.	n.a.	1.976	n.a.	15699	n.a.	n.a.	n.a.	n.a.	1976	0.442849	0.0205683	n.a.
10/11/13 Sample #2 M9	n.a.	18.373	n.a.	n.a.	n.a.	n.a.	2.231	n.a.	18373	n.a.	n.a.	n.a.	n.a.	2231	0.518279	0.0232227	n.a.
10/17/13 Sample #1 BB	n.a.	35.055	n.a.	n.a.	n.a.	n.a.	3.885	n.a.	35055	n.a.	n.a.	n.a.	n.a.	3885	0.988858	0.0404393	n.a.
10/17/13 Sample #2 M9	n.a.	19.079	n.a.	n.a.	n.a.	n.a.	2.322	n.a.	19079	n.a.	n.a.	n.a.	n.a.	2322	0.538195	0.0241699	n.a.
10/26/13 Sample #2 M9	n.a.	21.936	n.a.	n.a.	n.a.	n.a.	2.612	n.a.	21936	n.a.	n.a.	n.a.	n.a.	2612	0.618787	0.0271885	n.a.
11/1/13 Sample #1 BB	n.a.	108.258	n.a.	n.a.	n.a.	n.a.	10.62	n.a.	108258	n.a.	n.a.	n.a.	n.a.	10620	3.05382	0.110544	n.a.
11/1/13 Sample #2 M9	n.a.	43.118	n.a.	n.a.	n.a.	n.a.	4.622	n.a.	43118	n.a.	n.a.	n.a.	n.a.	4622	1.2163	0.0481108	n.a.
12/12/13 Sample #1 BB	n.a.	32.1167	n.a.	n.a.	n.a.	3.0448	3.1606	n.a.	32116.7	n.a.	n.a.	n.a.	3044.8	3160.6	0.905972	0.0328989	0.0320607
12/12/13 Sample #2 M9	0.0111	18.5337	n.a.	n.a.	n.a.	1.8232	1.8662	11.1	18533.7	n.a.	n.a.	n.a.	1823.2	1866.2	0.522812	0.0194254	0.0191976
1/3/14 Sample #1 BB	n.a.	64.1	n.a.	0.0009	n.a.	5.9847	6.0633	n.a.	64100	n.a.	0.9	n.a.	5984.7	6063.3	1.80818	0.0631134	0.0630167
1/3/14 Sample #2 M9	n.a.	59.3544	n.a.	n.a.	n.a.	5.5215	5.6439	n.a.	59354.4	n.a.	n.a.	n.a.	5521.5	5643.9	1.67431	0.0587478	0.0581394
1/10/14 Sample #1 BB	n.a.	77.452	n.a.	0.0289	n.a.	7.1524	7.2472	n.a.	77452	n.a.	28.9	n.a.	7152.4	7247.2	2.18482	0.0754367	0.0753122
1/10/14 Sample #2 M9	n.a.	61.2371	n.a.	0.0132	n.a.	5.7207	5.7962	n.a.	61237.1	n.a.	13.2	n.a.	5720.7	5796.2	1.72742	0.0603331	0.0602369
12/15/13 Sample #1 BB	n.a.	62.8821	n.a.	0.0013	n.a.	5.8938	5.974	n.a.	62882.1	n.a.	1.3	n.a.	5893.8	5974	1.77383	0.0621838	0.0620596
1/15/14 Sample #1 BB	n.a.	19.4095	n.a.	n.a.	n.a.	1.8605	1.8814	n.a.	19409.5	n.a.	n.a.	n.a.	1860.5	1881.4	0.547518	0.0195836	0.0195904
1/15/14 Sample #2 M9	n.a.	29.2732	n.a.	n.a.	n.a.	2.7937	2.8917	n.a.	29273.2	n.a.	n.a.	n.a.	2793.7	2891.7	0.82576	0.0300999	0.0294167
1/25/14 Sample #1 BB	n.a.	19.3922	n.a.	n.a.	n.a.	1.8677	1.9086	n.a.	19392.2	n.a.	n.a.	n.a.	1867.7	1908.6	0.54703	0.0198668	0.0196662
1/25/14 Sample #2 M9	n.a.	22.2583	n.a.	n.a.	n.a.	2.1294	2.1488	n.a.	22258.3	n.a.	n.a.	n.a.	2129.4	2148.8	0.627879	0.022367	0.0224218
1/31/14 Sample #1 BB	n.a.	24.7967	n.a.	n.a.	n.a.	2.442	2.4598	n.a.	24796.7	n.a.	n.a.	n.a.	2442	2459.8	0.699484	0.0256042	0.0257134
1/31/14 Sample #2 M9	n.a.	71.7277	n.a.	0.023	n.a.	6.6504	6.7429	n.a.	71727.7	n.a.	23	n.a.	6650.4	6742.9	2.02335	0.0701874	0.0700263
2-7-14 Sample #1 BB	n.a.	54.9122	n.a.	n.a.	n.a.	5.0835	5.1862	n.a.	54912.2	n.a.	n.a.	n.a.	5083.5	5186.2	1.549	0.0539836	0.0535274
2/7/14 Sample #2 M9	n.a.	48.5965	n.a.	n.a.	n.a.	4.5573	4.638	n.a.	48596.5	n.a.	n.a.	n.a.	4557.3	4638	1.37085	0.0482773	0.0479867
2/21/14 Sample #1 BB	n.a.	51.8386	n.a.	n.a.	n.a.	4.7663	4.9115	n.a.	51838.6	n.a.	n.a.	n.a.	4766.3	4911.5	1.4623	0.0511242	0.0501874
2/21/14 Sample #2 M9	n.a.	56.8071	n.a.	n.a.	n.a.	5.2168	5.3199	n.a.	56807.1	n.a.	n.a.	n.a.	5216.8	5319.9	1.60246	0.0553752	0.054931
2/22/14Sample #1 BB	0.0884	15.6327	n.a.	0.7546	n.a.	n.a.	2.2939	88.4	15632.7	n.a.	754.6	n.a.	n.a.	2293.9	0.440979	0.0238774	n.a.
2/22/14 Sample #2 M9	0.0811	14.4728	n.a.	0.7473	n.a.	n.a.	2.1987	81.1	14472.8	n.a.	747.3	n.a.	n.a.	2198.7	0.40826	0.0228864	n.a.
2/28/14 Sample #1 BB	n.a.	18.7478	n.a.	0.7672	n.a.	n.a.	2.554	n.a.	18747.8	n.a.	767.2	n.a.	n.a.	2554	0.528852	0.0265848	n.a.
2/28/14 Sample #2 M9	n.a.	18.1111	n.a.	0.76	n.a.	n.a.	2.5014	n.a.	18111.1	n.a.	760	n.a.	n.a.	2501.4	0.510891	0.0260373	n.a.
3/8/14 Sample #1 BB	n.a.	17.8139	n.a.	0.7603	n.a.	n.a.	2.4788	n.a.	17813.9	n.a.	760.3	n.a.	n.a.	2478.8	0.502508	0.025802	n.a.
3/8/14 Sample #2 M9	n.a.	18.5644	n.a.	0.7644	n.a.	n.a.	2.545	n.a.	18564.4	n.a.	764.4	n.a.	n.a.	2545	0.523678	0.0264911	n.a.
3/14/14 Sample #1 BB	n.a.	19.344	n.a.	0.7683	n.a.	n.a.	2.6144	n.a.	19344	n.a.	768.3	n.a.	n.a.	2614.4	0.54567	0.0272135	n.a.
3/21/14 Sample #1 BB	n.a.	19.2943	n.a.	0.7681	n.a.	n.a.	2.5966	n.a.	19294.3	n.a.	768.1	n.a.	n.a.	2596.6	0.544268	0.0270282	n.a.
3/21/14Sample #2 M9	n.a.	19.1963	n.a.	0.7625	n.a.	n.a.	2.5893	n.a.	19196.3	n.a.	762.5	n.a.	n.a.	2589.3	0.541504	0.0269522	n.a.
3/28/14 Sample #1 BB	n.a.	18.352	n.a.	0.7544	n.a.	n.a.	2.5173	n.a.	18352	n.a.	754.4	n.a.	n.a.	2517.3	0.517687	0.0262028	n.a.
3/28/14 Sample #2 M9	0.0819	19.3995	n.a.	0.763	n.a.	n.a.	2.6	81.9	19399.5	n.a.	763			2600	0.547236	0.0270636	n.a.
4/11/14 Sample #2 M9	n.a.	66.8991	n.a.	n.a.	n.a.	6.1609	6.1609	n.a.	66899.1	n.a.	n.a.	n.a.	6160.9	6160.9	1.88714	0.0641293	0.0648721
4/11/14 Sample #1 BB	n.a.	12.4979	n.a.	0.7459	n.a.	n.a.	2.018	n.a.	12497.9	n.a.	745.9	n.a.	n.a.	2018	0.35255	0.0210055	n.a.
4/25/14 sample #1 M9	n.a.	16.501	n.a.	0.7628	n.a.	n.a.	2.3802	n.a.	16501	n.a.	762.8	n.a.	n.a.	2380.2	0.465472	0.0247757	n.a.
5/02/14 sample #1 BB	n.a.	12.711	n.a.	n.a.	n.a.	n.a.	1.638	n.a.	12711	n.a.	n.a.	n.a.	n.a.	1638	0.358561	0.0170501	n.a.
5/02/14 sample #2 M9	n.a.	14.378	n.a.	n.a.	n.a.	n.a.	1.83	n.a.	14378	n.a.	n.a.	n.a.	n.a.	1830	0.405585	0.0190486	n.a.
5/30/14 sample #2 M9	n.a.	14.858	n.a.	n.a.	n.a.	n.a.	1.894	n.a.	14858	n.a.	n.a.	n.a.	n.a.	1894	0.419126	0.0197148	n.a.
6/21/14 sample #2 M9	n.a.	14.801	n.a.	n.a.	n.a.	n.a.	1.869	n.a.	14801	n.a.	n.a.	n.a.	n.a.	1869	0.417518	0.0194546	n.a.
