# Supplementary material for: Fine grained compositional analysis of Port Everglades Inlet microbiome using high throughput DNA sequencing
Source: PeerJ. 2018 May 8;6:e4671. doi: 10.7717/peerj.4671 (PMC5947159; doi:10.7717/peerj.4671)
Supplement: Table S1 — The sample IDs inclusive of the month and date on which sampling took place. All samples were used for statistical analyses in downstream bioinformatics analysis. [file peerj-06-4671-s001.xlsx]

## Sheet: Sheet1
#SampleID	MonthSampleTaken	Date
PE12	July	2013-07-10
PE15	July	2013-07-19
PE17	July	2013-07-23
PE18	July	2013-07-23
PE20	August	2013-08-03
PE21	August	2013-08-03
PE26	August	2013-08-17
PE27	August	2013-08-17
PE32	September	2013-09-05
PE33	September	2013-09-05
PE41	September	2013-09-27
PE42	September	2013-09-27
PE44	October	2013-10-03
PE45	October	2013-10-03
PE50	October	2013-10-17
PE51	October	2013-10-17
PE55	November	2013-11-01
PE56	November	2013-11-01
PE64	November	2013-11-21
PE66	November	2013-11-21
PE67	December	2013-12-05
PE68	December	2013-12-05
PE73	December	2013-12-15
PE74	December	2013-12-15
PE82	January	2014-01-15
PE83	January	2014-01-15
PE89	January	2014-01-31
PE90	January	2014-01-31
PE92	February	2014-02-07
PE93	February	2014-02-07
PE101	February	2014-02-28
PE102	February	2014-02-28
PE104	March	2014-03-08
PE105	March	2014-03-08
PE113	March	2014-03-28
PE114	March	2014-03-28
PE119	April	2014-04-11
PE120	April	2014-04-11
PE125	April	2014-04-25
PE126	April	2014-04-25
PE128	May	2014-05-02
PE129	May	2014-05-02
PE140	May	2014-05-30
PE141	May	2014-05-30
PE143	June	2014-06-06
PE144	June	2014-06-06
PE149	June	2014-06-21
PE150	June	2014-06-21
