# Supplementary material for: Fine grained compositional analysis of Port Everglades Inlet microbiome using high throughput DNA sequencing
Source: PeerJ. 2018 May 8;6:e4671. doi: 10.7717/peerj.4671 (PMC5947159; doi:10.7717/peerj.4671)
Supplement: Table S4 — There were no significant difference in relative abundance of any taxa in this group over the year. W values indicate statistical significance. High W values indicate significant differences in abundance levels of data. [file peerj-06-4671-s004.xlsx]

## Sheet: ancom-12.csv
	Percentile	0	25	50	75	100	0	25	50	75	100	Reject null hypothesis	W
Classification	OTU	Dry	Dry	Dry	Dry	Dry	Wet	Wet	Wet	Wet	Wet
Marinococcus unidentified sp. 1	f69bfd3fcbab6ddbf11a8f4adf035b85	1	1	1	1	20	1	1	1	1	1	FALSE	1
Megasphaera unidentified sp. 1	c9c00229e537ae4a2cd46dcade8e41b1	1	1	1	1	4	1	1	1	1	1	FALSE	1
Epulopiscium unidentified sp. 1	2a5d92d4512c9b36bcd00996643fa5da	1	1	1	1	8	1	1	1	1	1	FALSE	1
Faecalibacterium prausnitzii	2c1b0ff4b45b55a6ca8a3350b9a76a84	1	1	1	1	10	1	1	1	1	1	FALSE	1
Unclassified Clostridiales	7e1bb26124f61ab735be2c0072b8b532	1	1	1	1	14	1	1	1	1	1	FALSE	1
Unclassified Ruminococcaceae	15f7dc91df33f72fe0abe6f05a485c1b	1	1	1	1	1	1	1	1	1	4	FALSE	1
WH1-8 unidentified sp. 1	873843c75b244b2b725e264ddb0604fc	1	1	1	1	1	1	1	1	1	13	FALSE	0
Unclassified Veillonellaceae	2bb449b385800967863db2f10f14f5a7	1	1	1	1	19	1	1	1	1	1	FALSE	1
Clostridium perfringens unidentified strain 1	b6af9af576f2abf68462a44f73d1cdfc	1	1	1	1	1	1	1	1	1	17	FALSE	1
Anaerovibrio unidentified sp. 1	f64e6dc450c3c77880fa6b79f294ee2c	1	1	1	1	17	1	1	1	1	1	FALSE	1
Unclassified Clostridiales	a1017e3d729d9ccea780c82dca437091	1	1	1	1	25	1	1	1	1	1	FALSE	1
Unclassified Clostridiales	9120c6b38f215a9eac1a78d1f1b588cd	1	1	1	1	1	1	1	1	1	22	FALSE	0
Clostridium perfringens unidentified strain 2	af22244dddd211d346b39990f31b5819	1	1	1	1	18	1	1	1	1	1	FALSE	1
Lactococcus unidentified sp. 1	115498a08f15393060fabc4160257d3d	1	1	1	1	11	1	1	1	1	1	FALSE	1
Clostridium unidentified sp. 1	803d9e744fc518982d668d163e1faaca	1	1	1	1	17	1	1	1	1	1	FALSE	1
Faecalibacterium prausnitzii unidentified strain 1	4feecebcfdcdaaa1e598fa481eccb84d	1	1	1	1	1	1	1	1	1	3	FALSE	1
Unclassified Peptostreptococcaceae	08887700869ed029685b2cb3f6fe9e1c	1	1	1	1	17	1	1	1	1	9	FALSE	1
Unclassified Bacillaceae	59757834dfa06a90e3b9f90468d70fed	1	1	1	1	17	1	1	1	1	1	FALSE	1
Unclassified Clostridiales	ca39b4622ace389d8a97742ca680cc3d	1	1	1	1	7	1	1	1	1	1	FALSE	1
Unclassified Clostridiales	52ab3c4d9fa512fa0d1bc5e32ac939af	1	1	1	1	1	1	1	1	1	15	FALSE	1
Unclassified Clostridiales	598f73329ed8b92a82c19c40b4359a39	1	1	1	1	1	1	1	1	1	20	FALSE	1
WH1-8 unidentified sp. 2	6443826913f41eeeb35deeb5f768b7b2	1	1	1	1	11	1	1	1	1	11	FALSE	1
Coprococcus unidentified sp. 1	8ad77579521e2d66c1923ad5514b59ad	1	1	1	1	16	1	1	1	1	1	FALSE	1
Epulopiscium unidentified sp. 2	7a4f9ce1582404d801797c0ccee90196	1	1	1	1	5	1	1	1	1	1	FALSE	1
Lactobacillus delbrueckii	183be89a077b08c671f7ba445fbc8b77	1	1	1	1	6	1	1	1	1	1	FALSE	1
Staphylococcus unidentified sp. 1	40c68fadfea5c3a1139a4626e6371a74	1	1	1	1	1	1	1	1	1	11	FALSE	1
Fusibacter unidentified sp. 1	9cf74dd2d19f6050c294b77fa460a39b	1	1	1	1	13	1	1	1	1	1	FALSE	1
Streptococcus unidentified sp. 1	aac160b4190f7e6a3ebda32f1277705a	1	1	1	1	9	1	1	1	1	1	FALSE	1
Staphylococcus unidentified sp. 2	6c5bbcc09ed7aea42b0638e2f262835e	1	1	1	1	11	1	1	1	1	54	FALSE	0
Fusibacter unidentified sp. 2	6ba576448c6b39e69f2215d0bd38b73f	1	1	1	1	17	1	1	1	1	1	FALSE	1
WH1-8 unidentified sp. 3	dea0db071f11e7845fddf8c8df3b2f07	1	1	1	1	1	1	1	1	1	6	FALSE	1
Unclassified Clostridiales	3ead92a1238b6b91805c94dceb90f800	1	1	1	1	35	1	1	1	1	1	FALSE	1
Faecalibacterium prausnitzii unidentified strain 2	d7f05dbcd1adbfa6cc0d862ad3644740	1	1	1	1	7	1	1	1	1	1	FALSE	1
Faecalibacterium prausnitzii unidentified strain 3	ca8a3b52b3e371c65234f57b1e72702a	1	1	1	1	9	1	1	1	1	1	FALSE	1
Unclassified Clostridiaceae	8b9b1c4b50b1b31e3c2e3f31e4b2fa54	1	1	1	1	1	1	1	1	1	13	FALSE	0
Faecalibacterium prausnitzii unidentified strain 4	d06d51ba722f0984ce3d8cfc5fa96f0e	1	1	1	1	1	1	1	1	1	8	FALSE	1
Tissierella Soehngenia	bb9773f76fd2c8171ec315c6aed92d6d	1	1	1	1	1	1	1	1	1	28	FALSE	1
Roseburia faecis	d65bf1fc8e8fbafdd90b78e28ab52350	1	1	1	1	35	1	1	1	1	1	FALSE	1
Unclassified Lactobacillales	3dc3d20ad2f59997ff25e47be4c4a33a	1	1	1	1	1	1	1	1	1	6	FALSE	1
